# Supplementary material
Source: Springer Nature journal article supplement (https://www.springermedizin.de/resource/supplementary/12985_2009_783_MOESM3_ESM.pdf/9609188)

Swine/Gent/7652/99

Duck/Belgium/06936/06

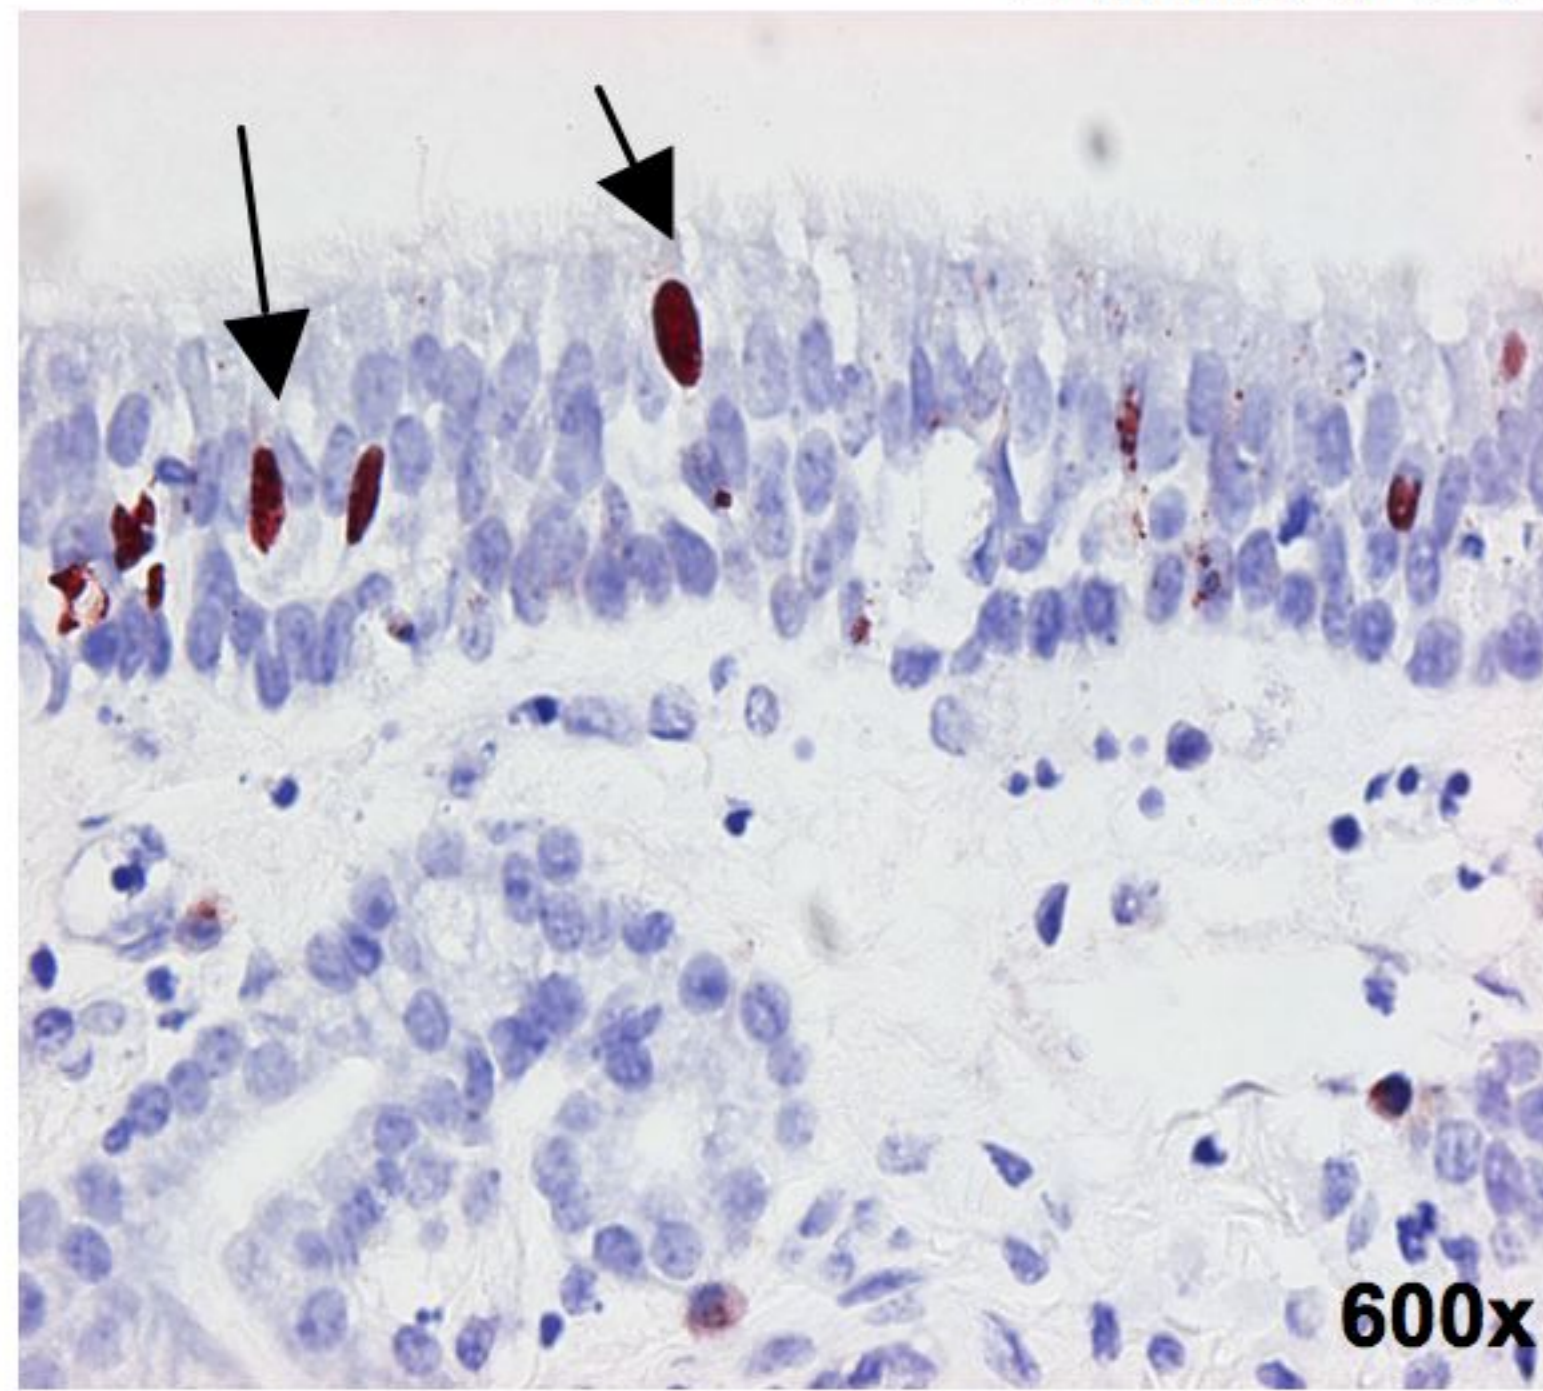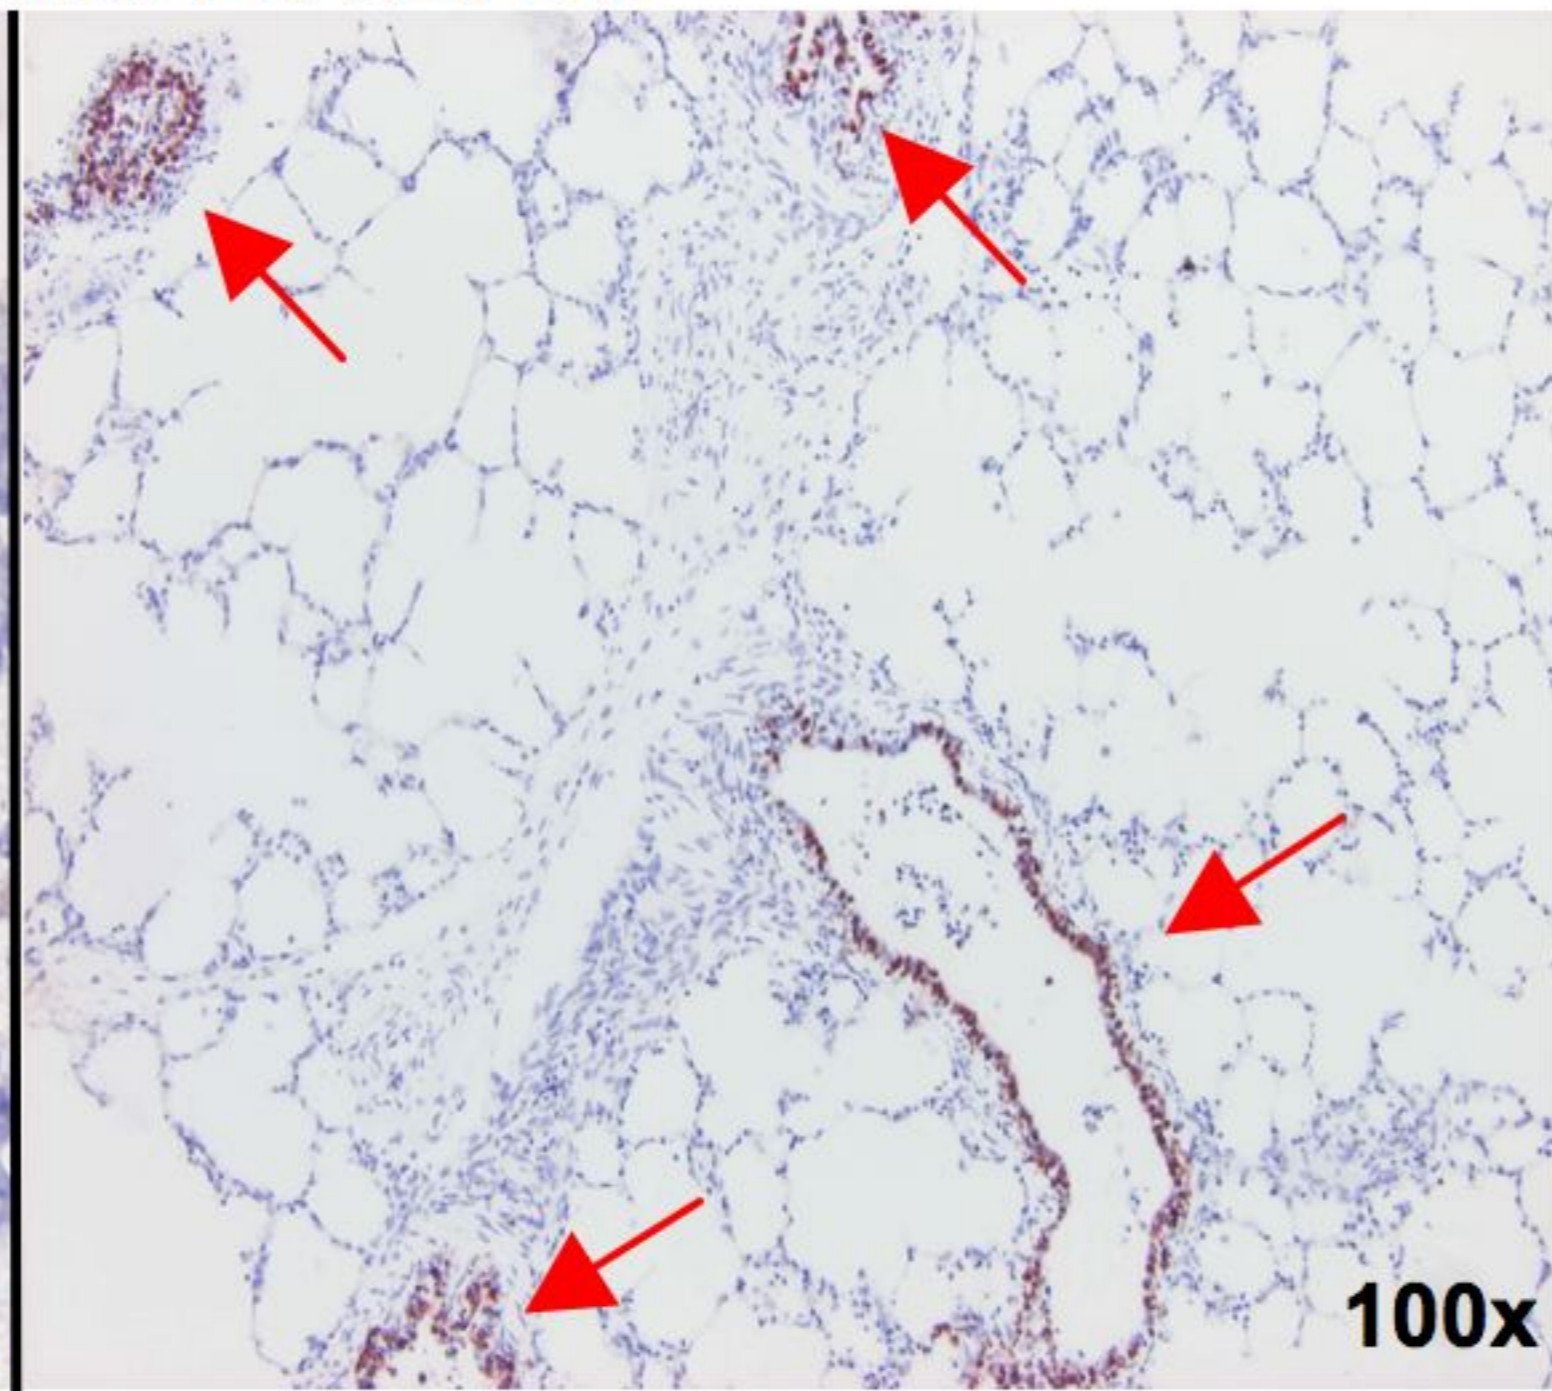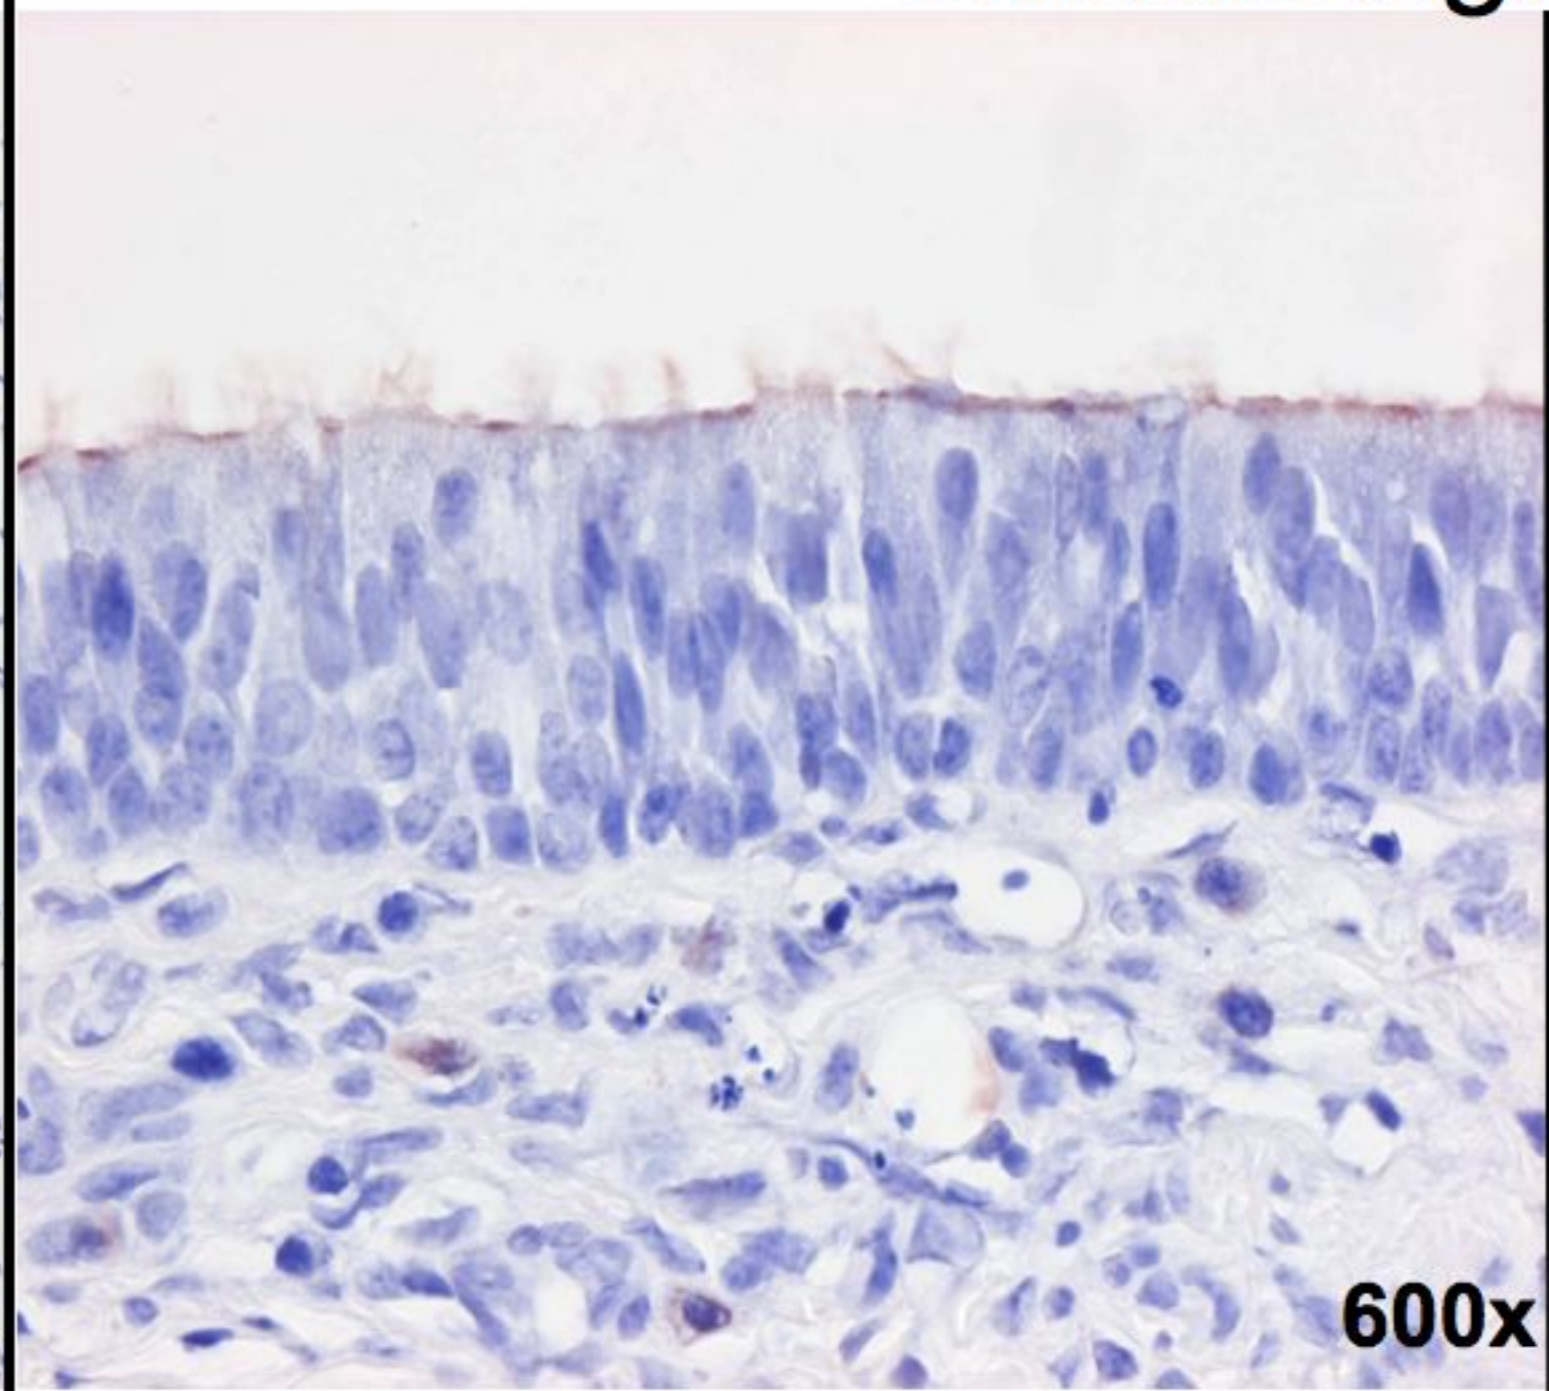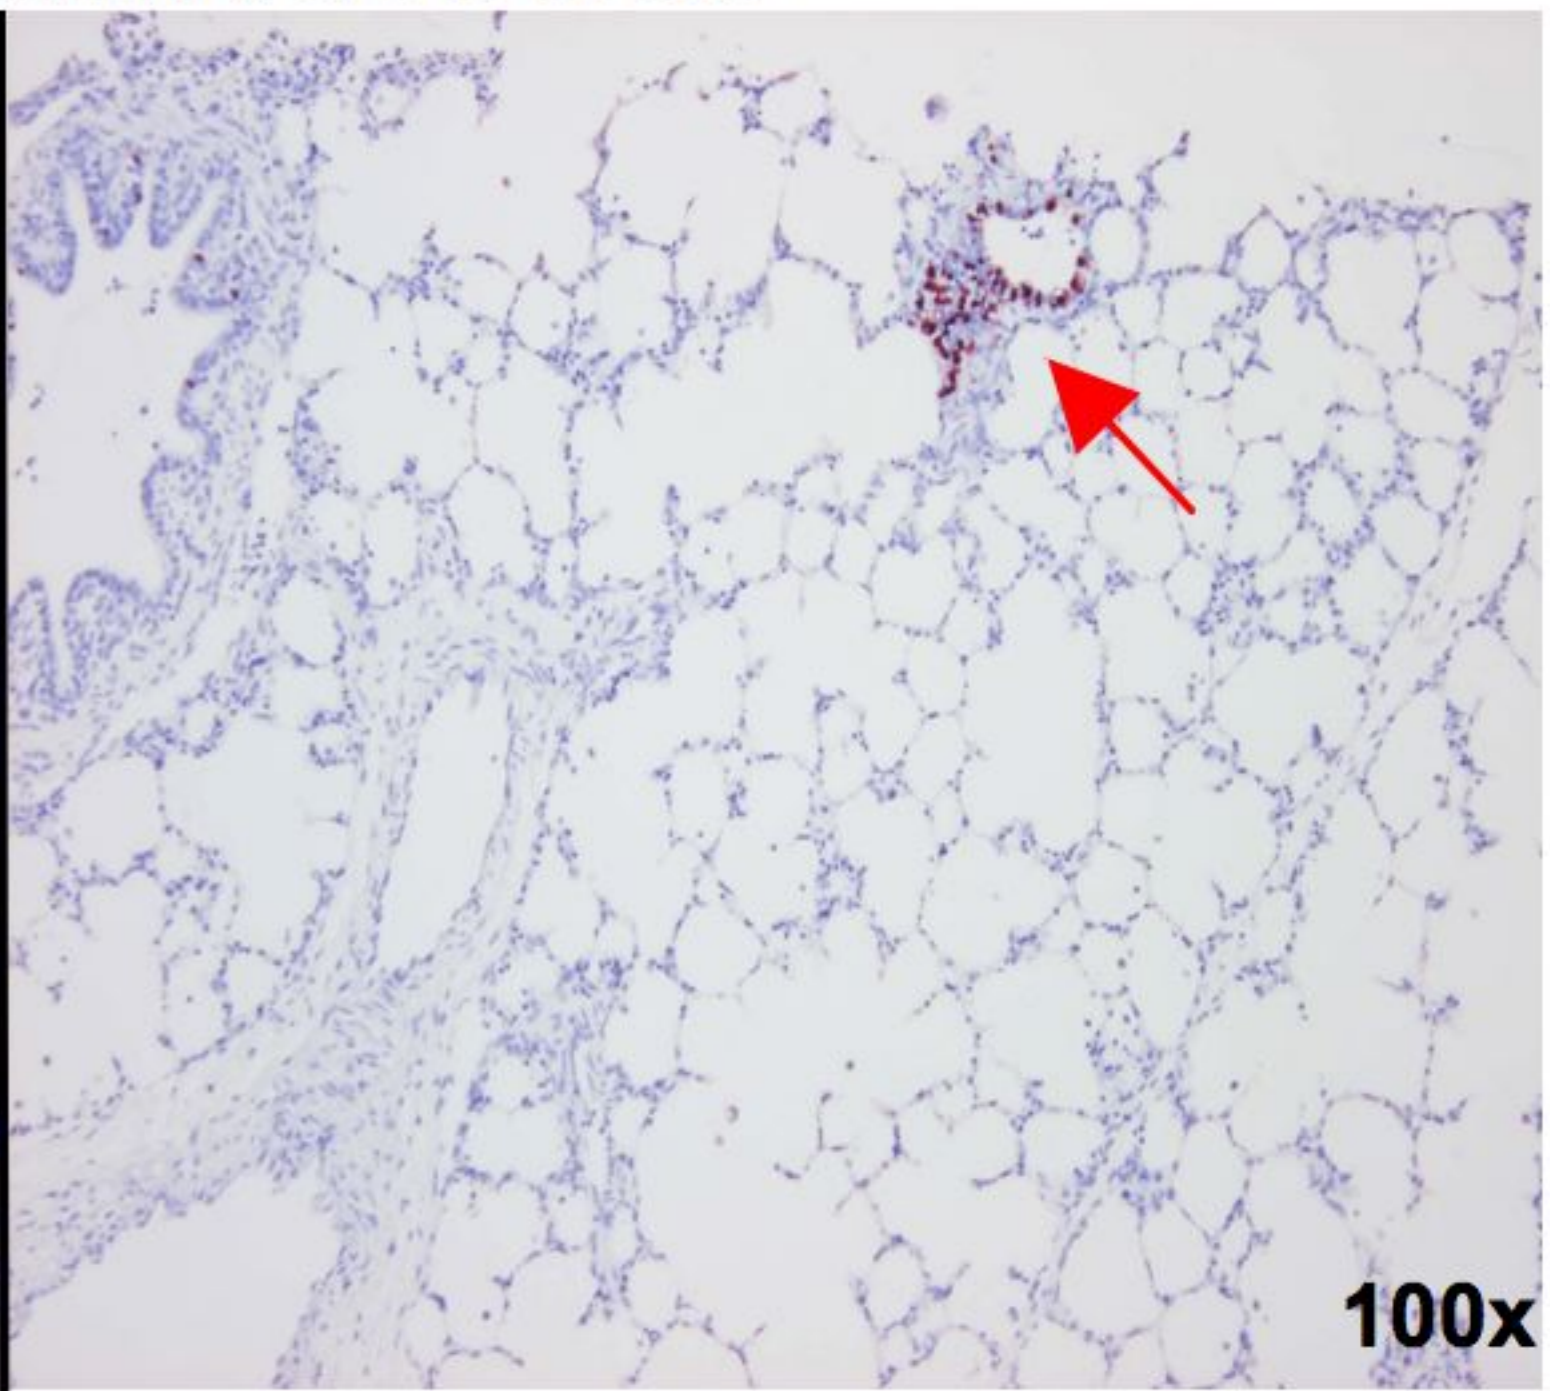

**A** +

**D** ++

**a** -

**d** +

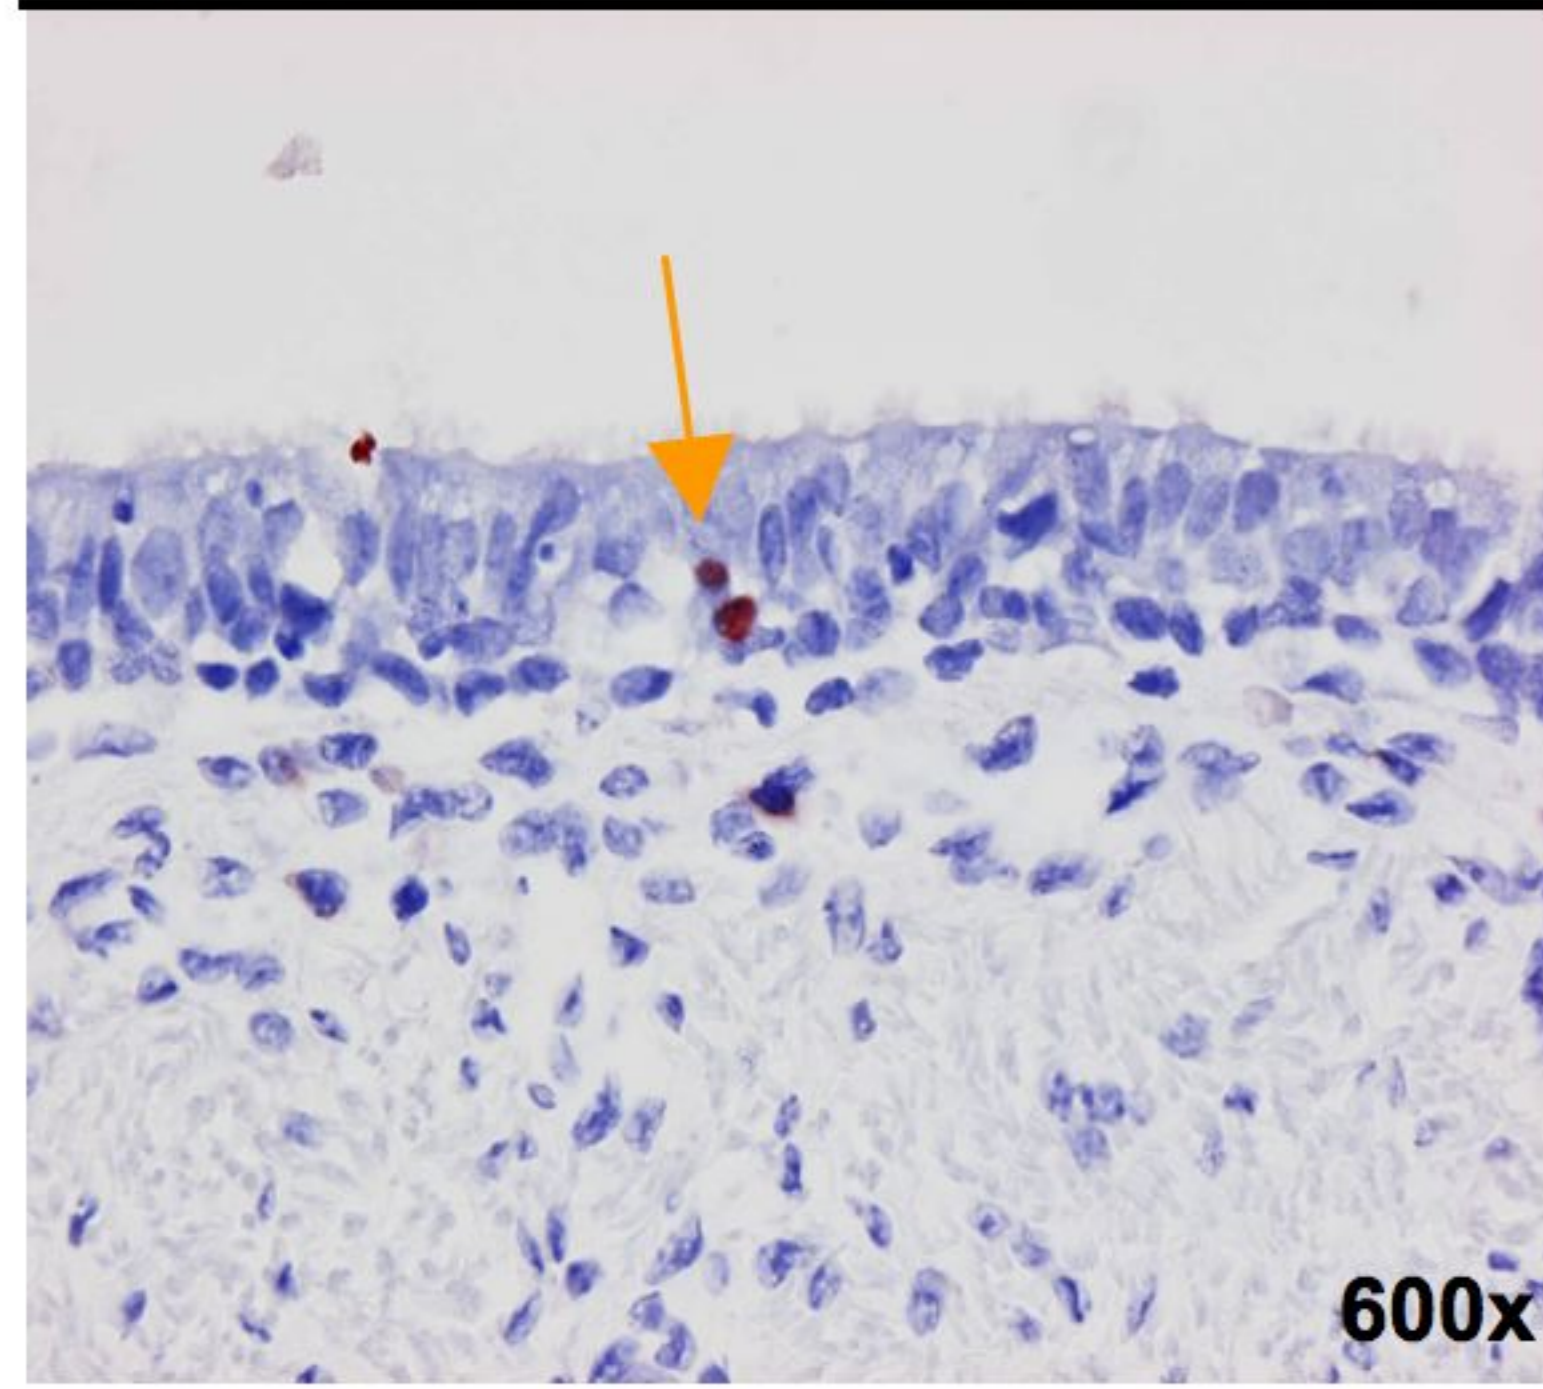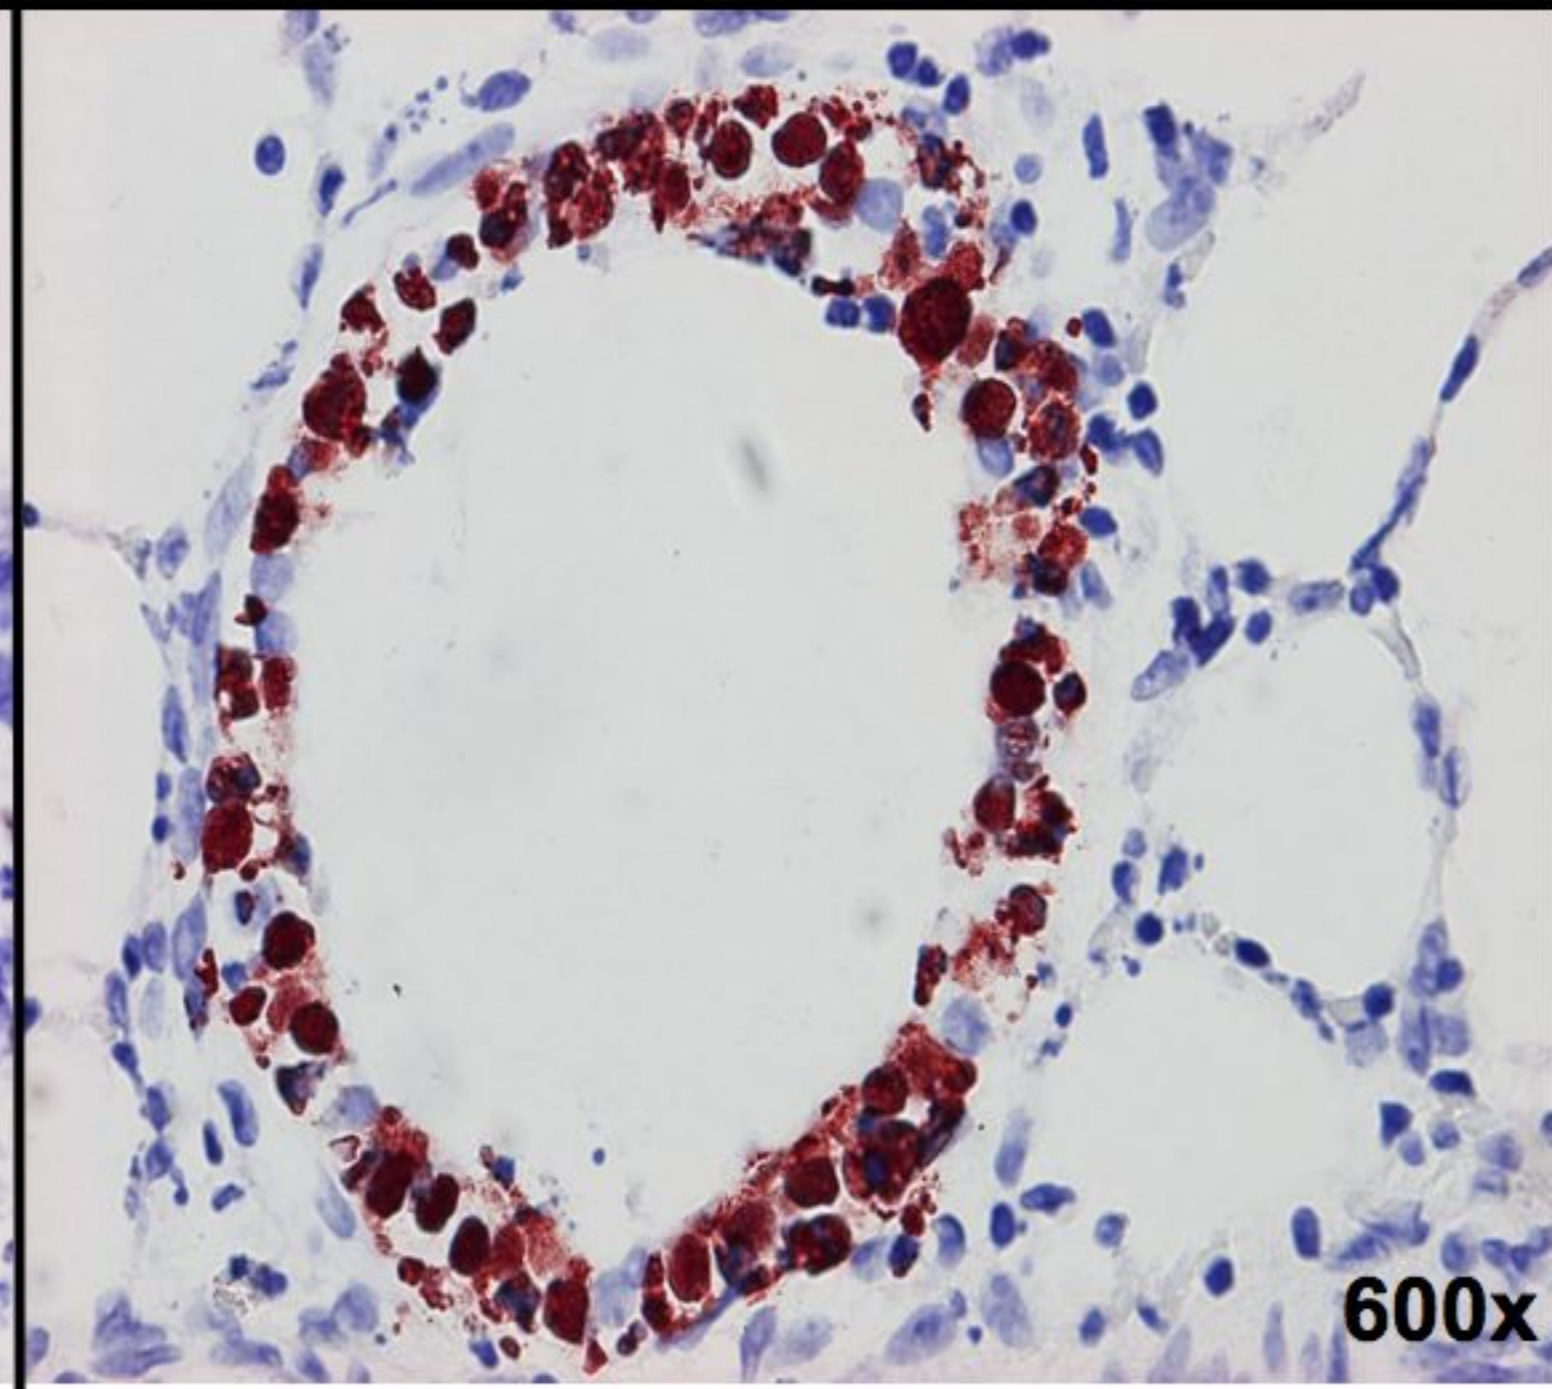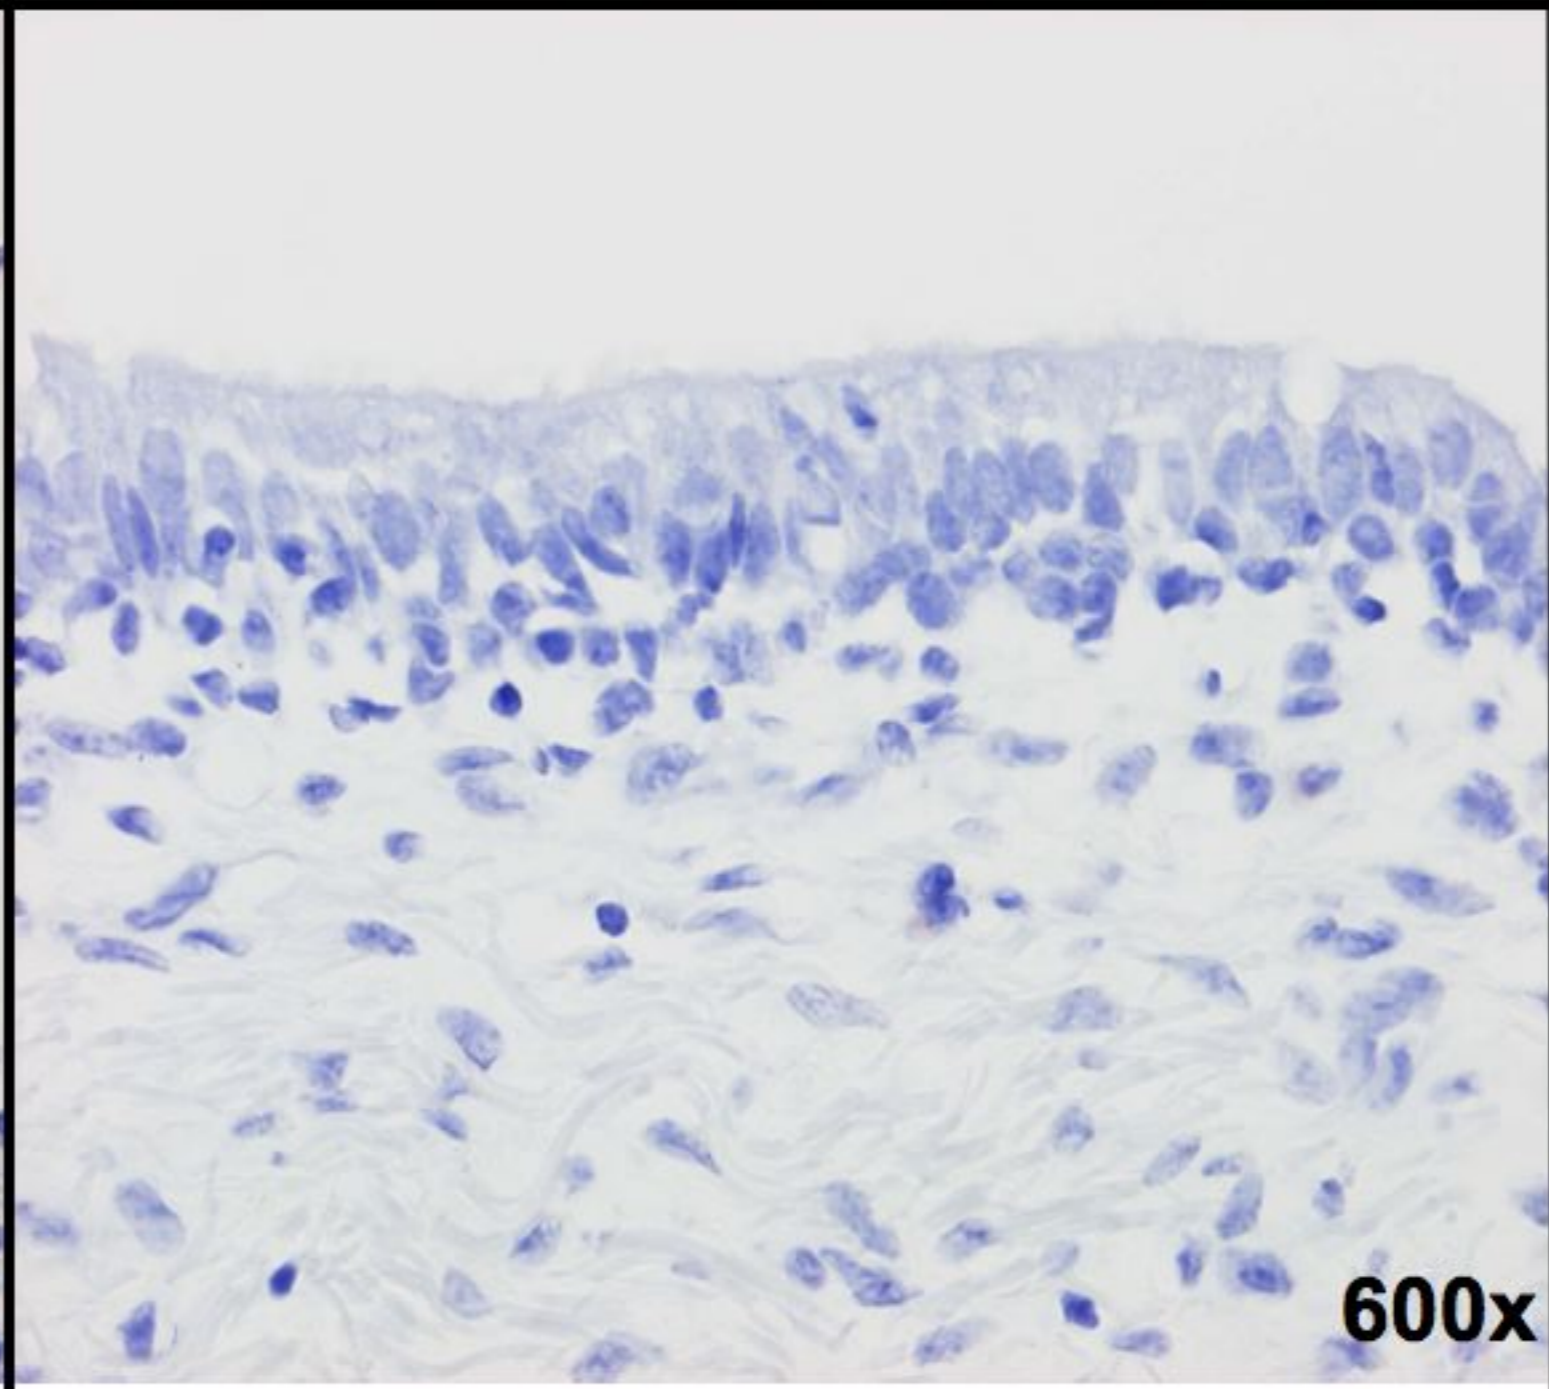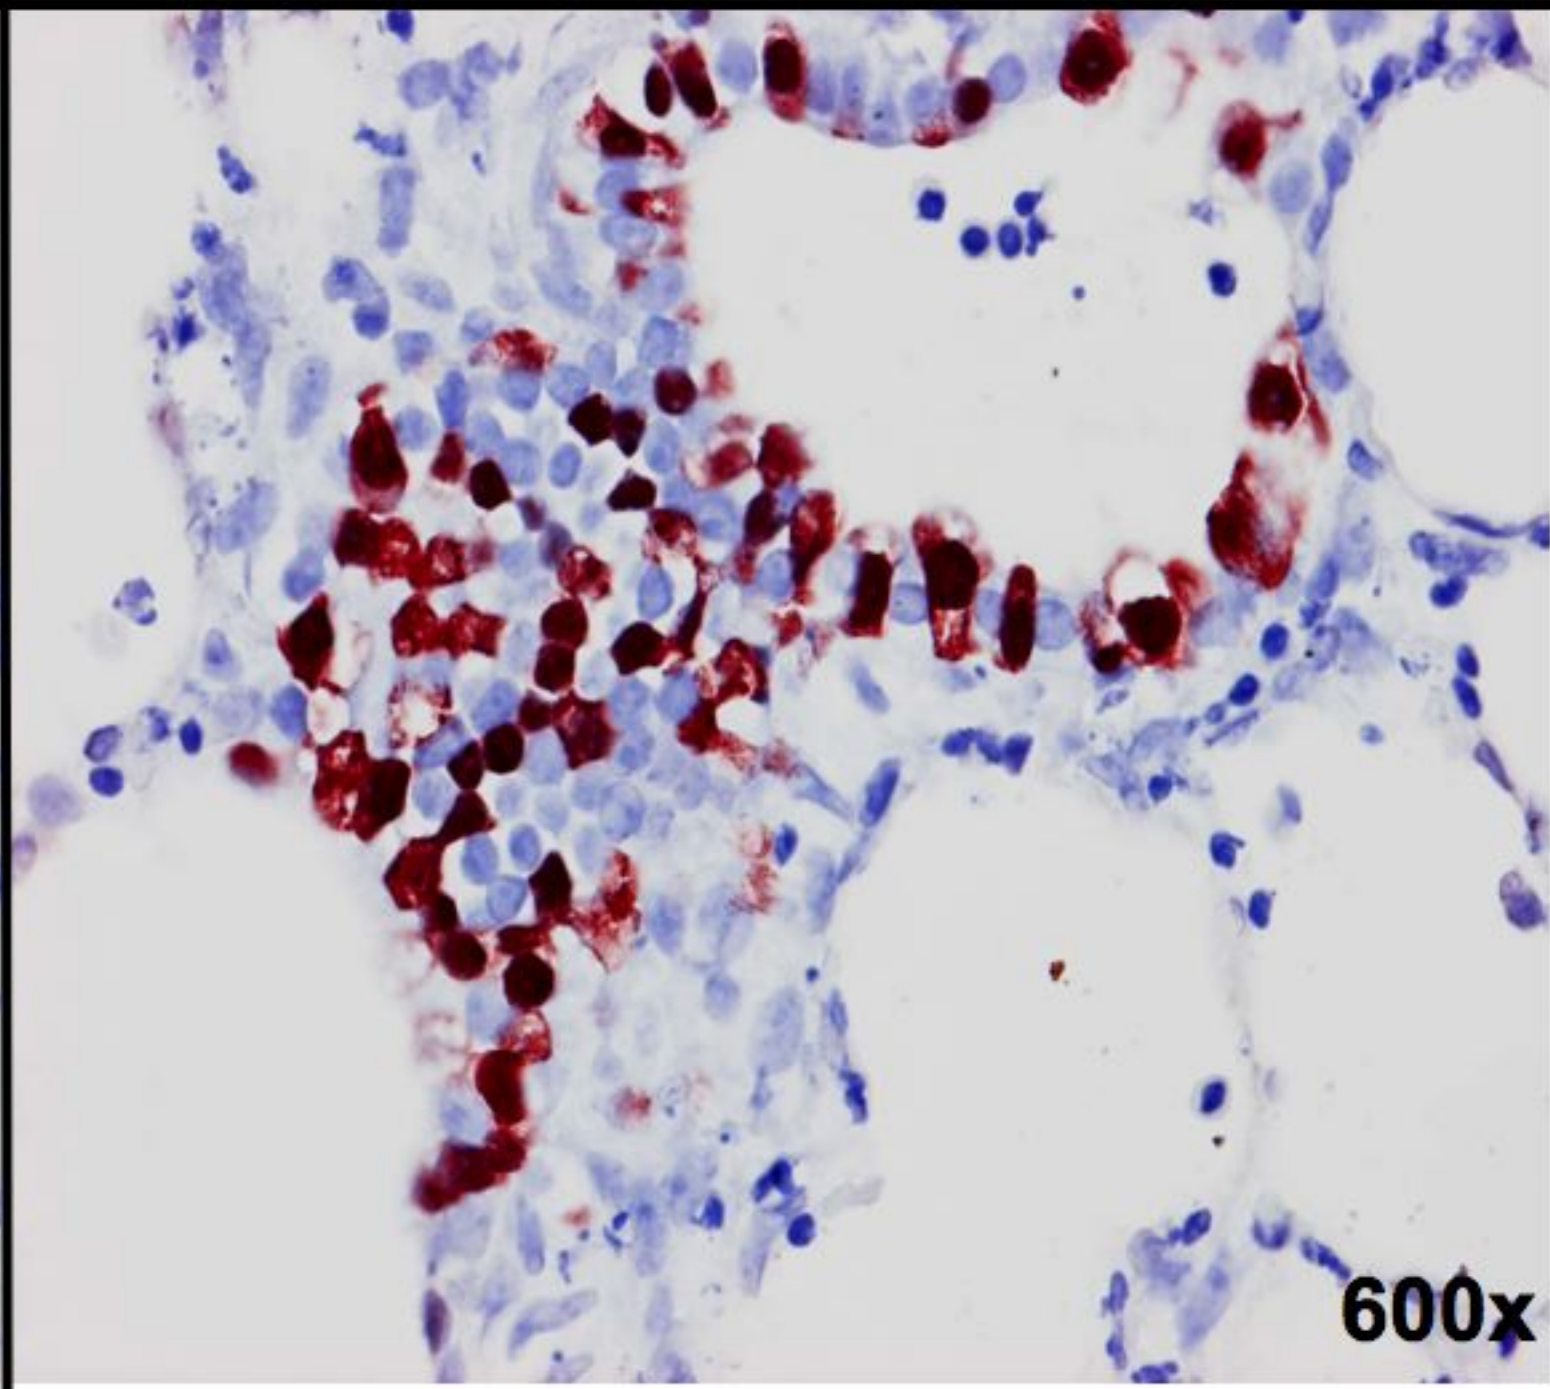

**B** +/-

**E** +++

**b** -

**e** +

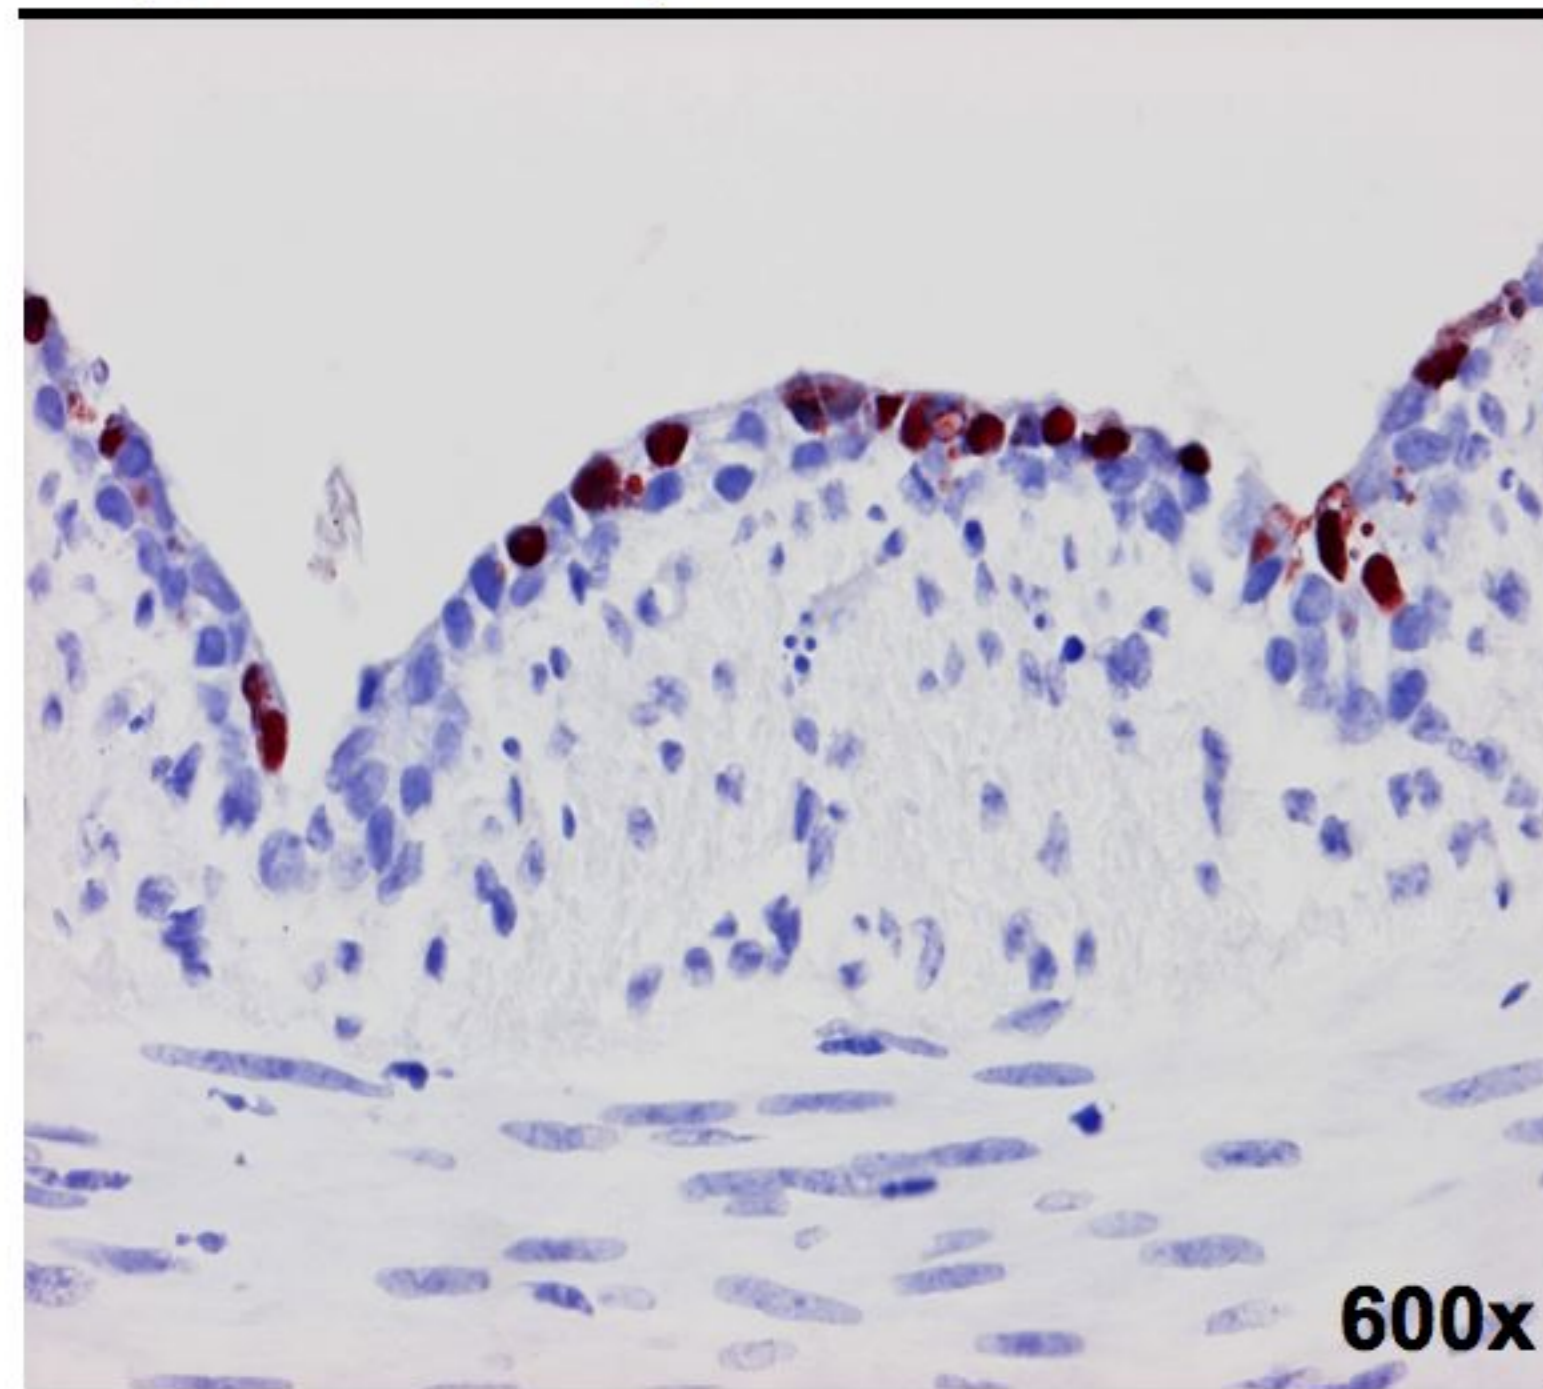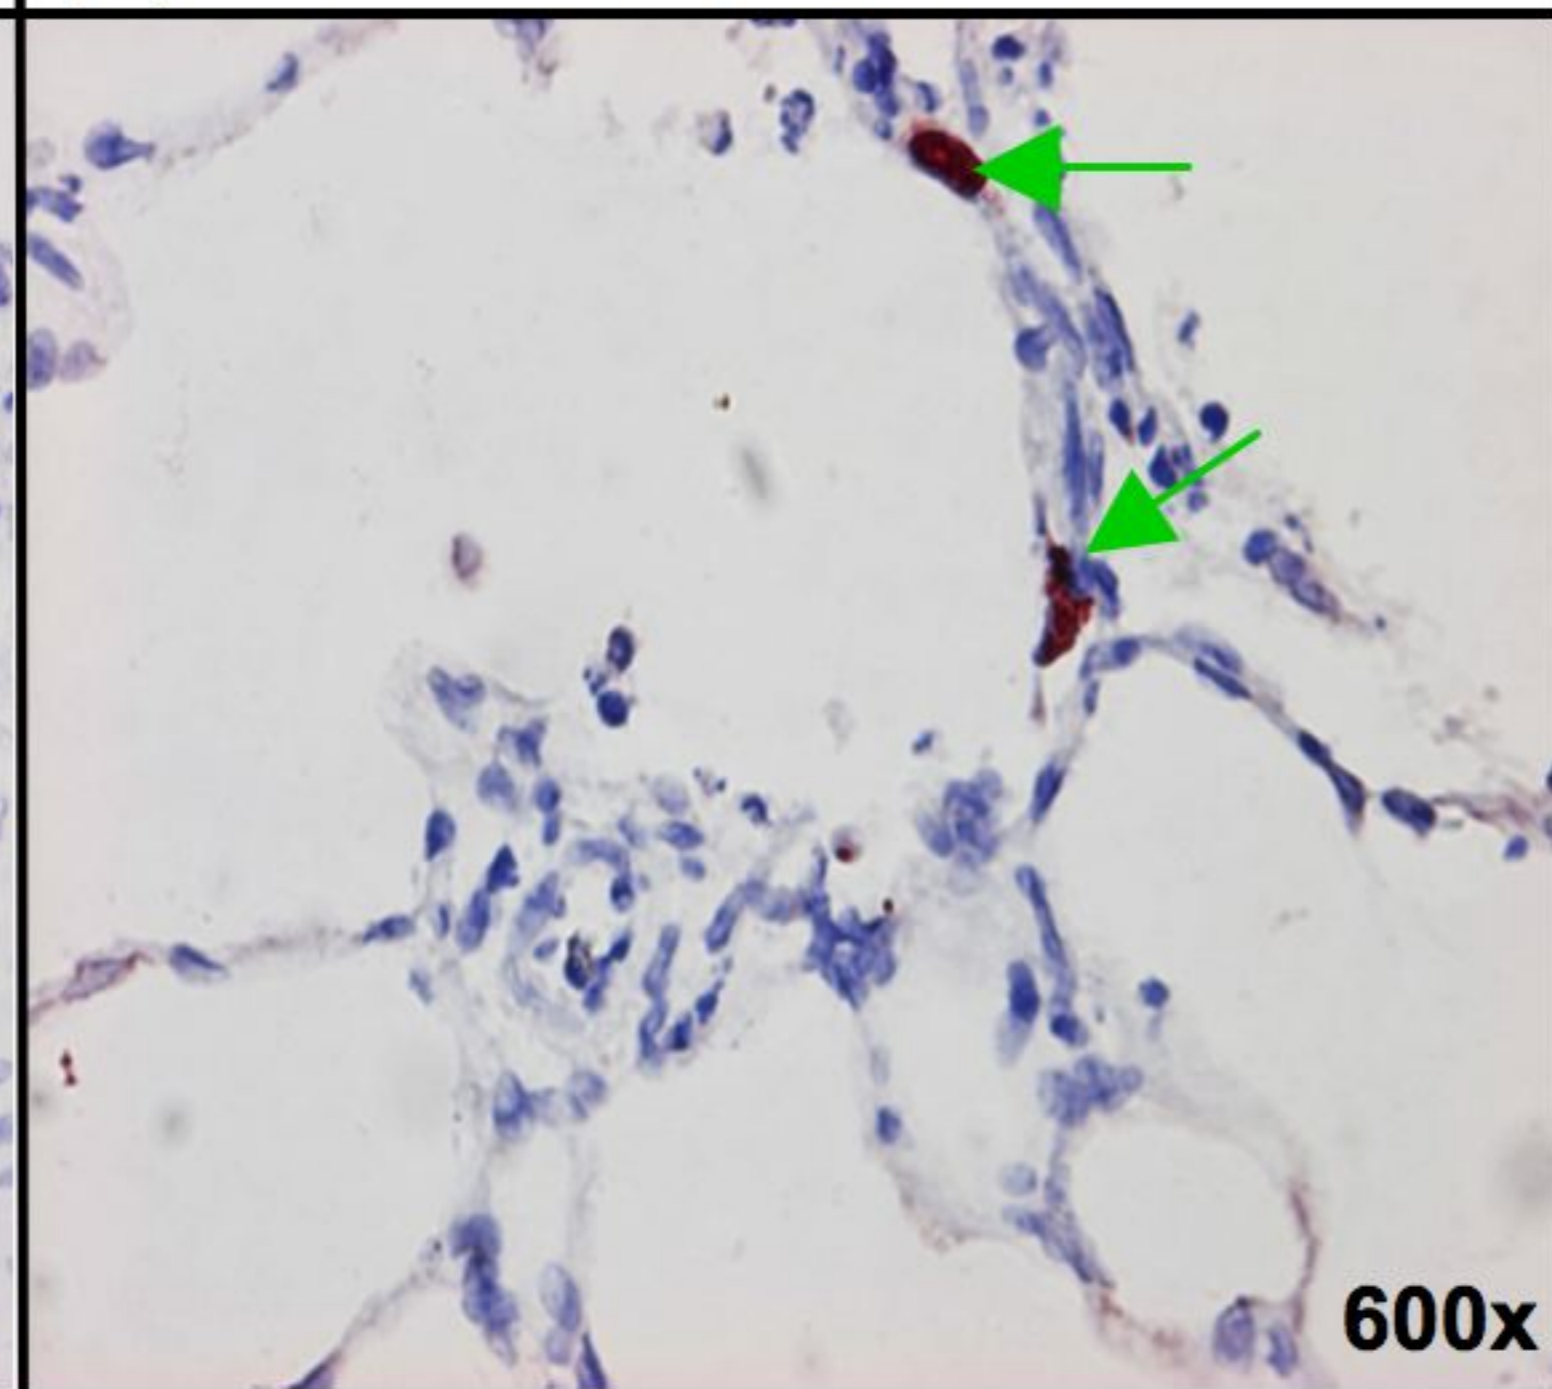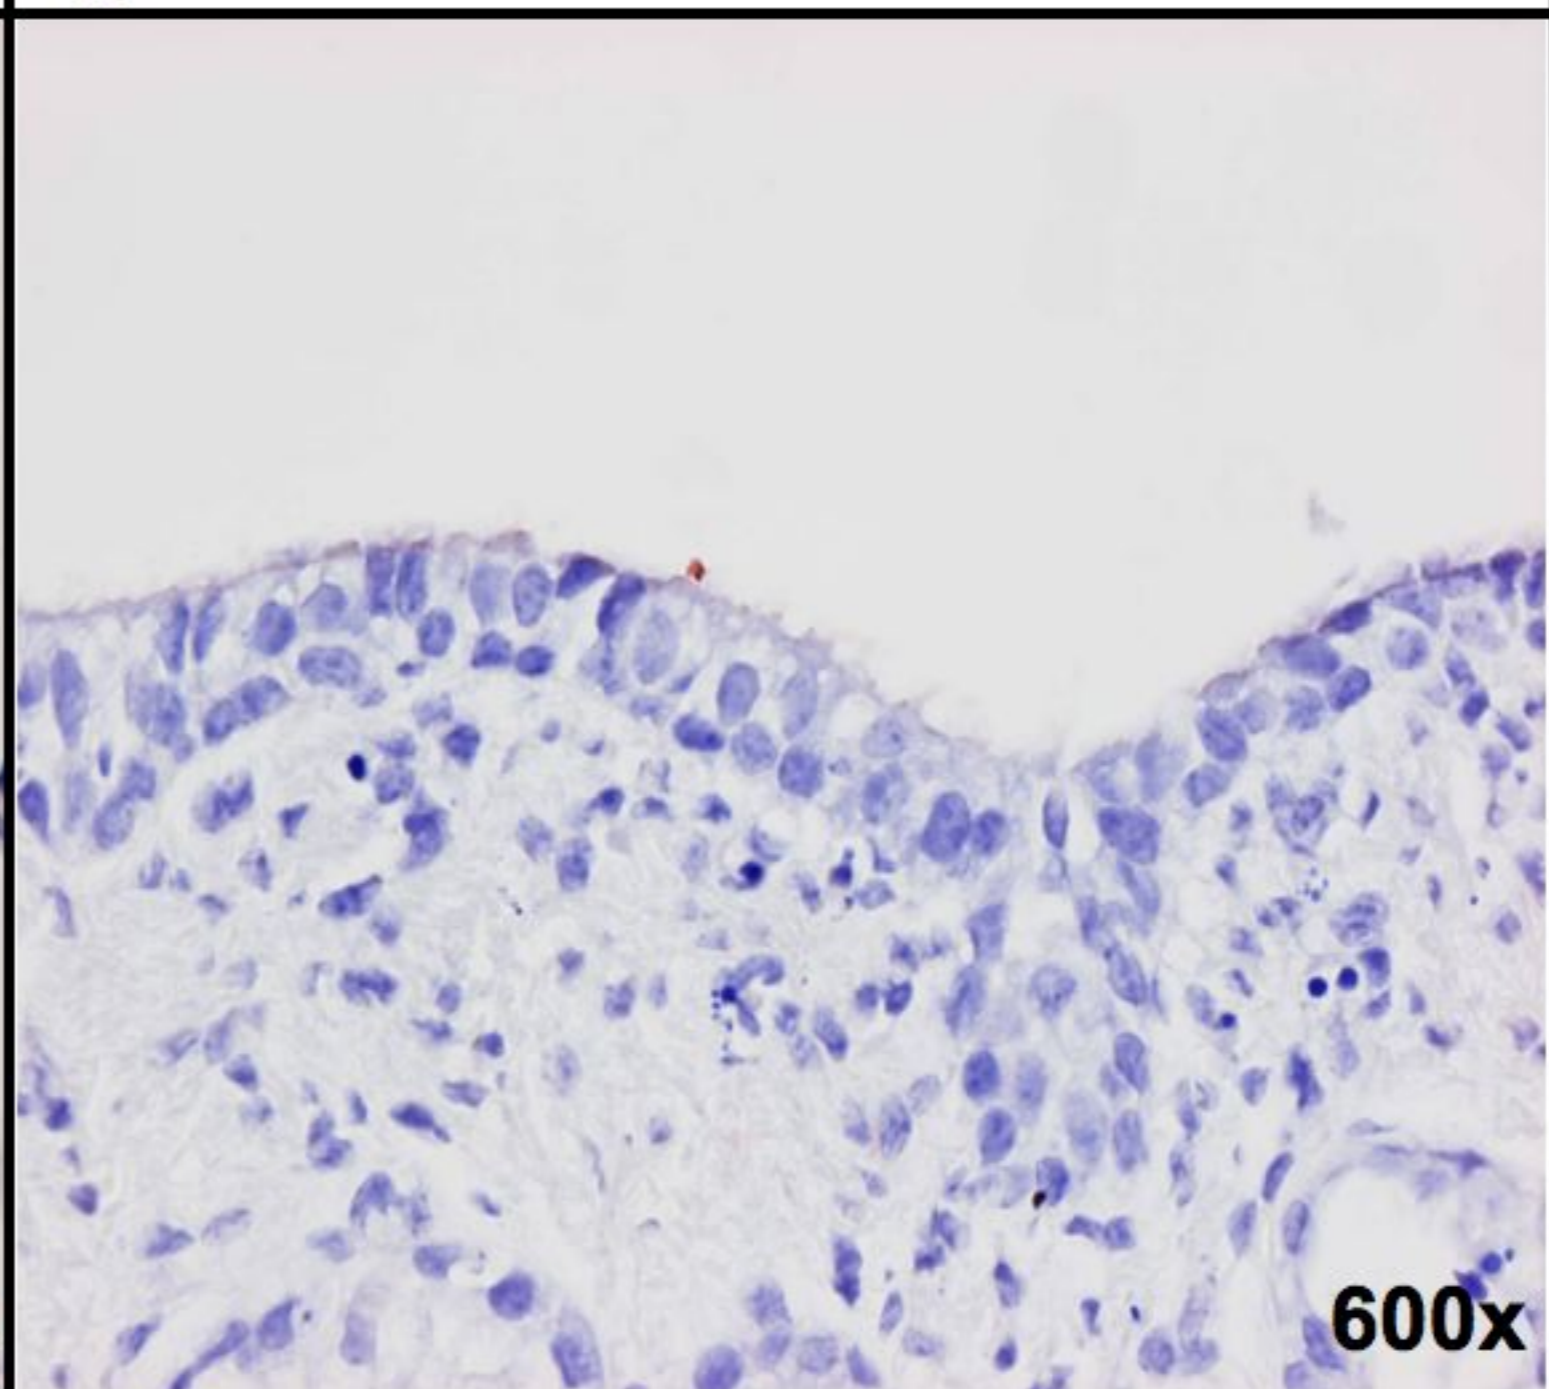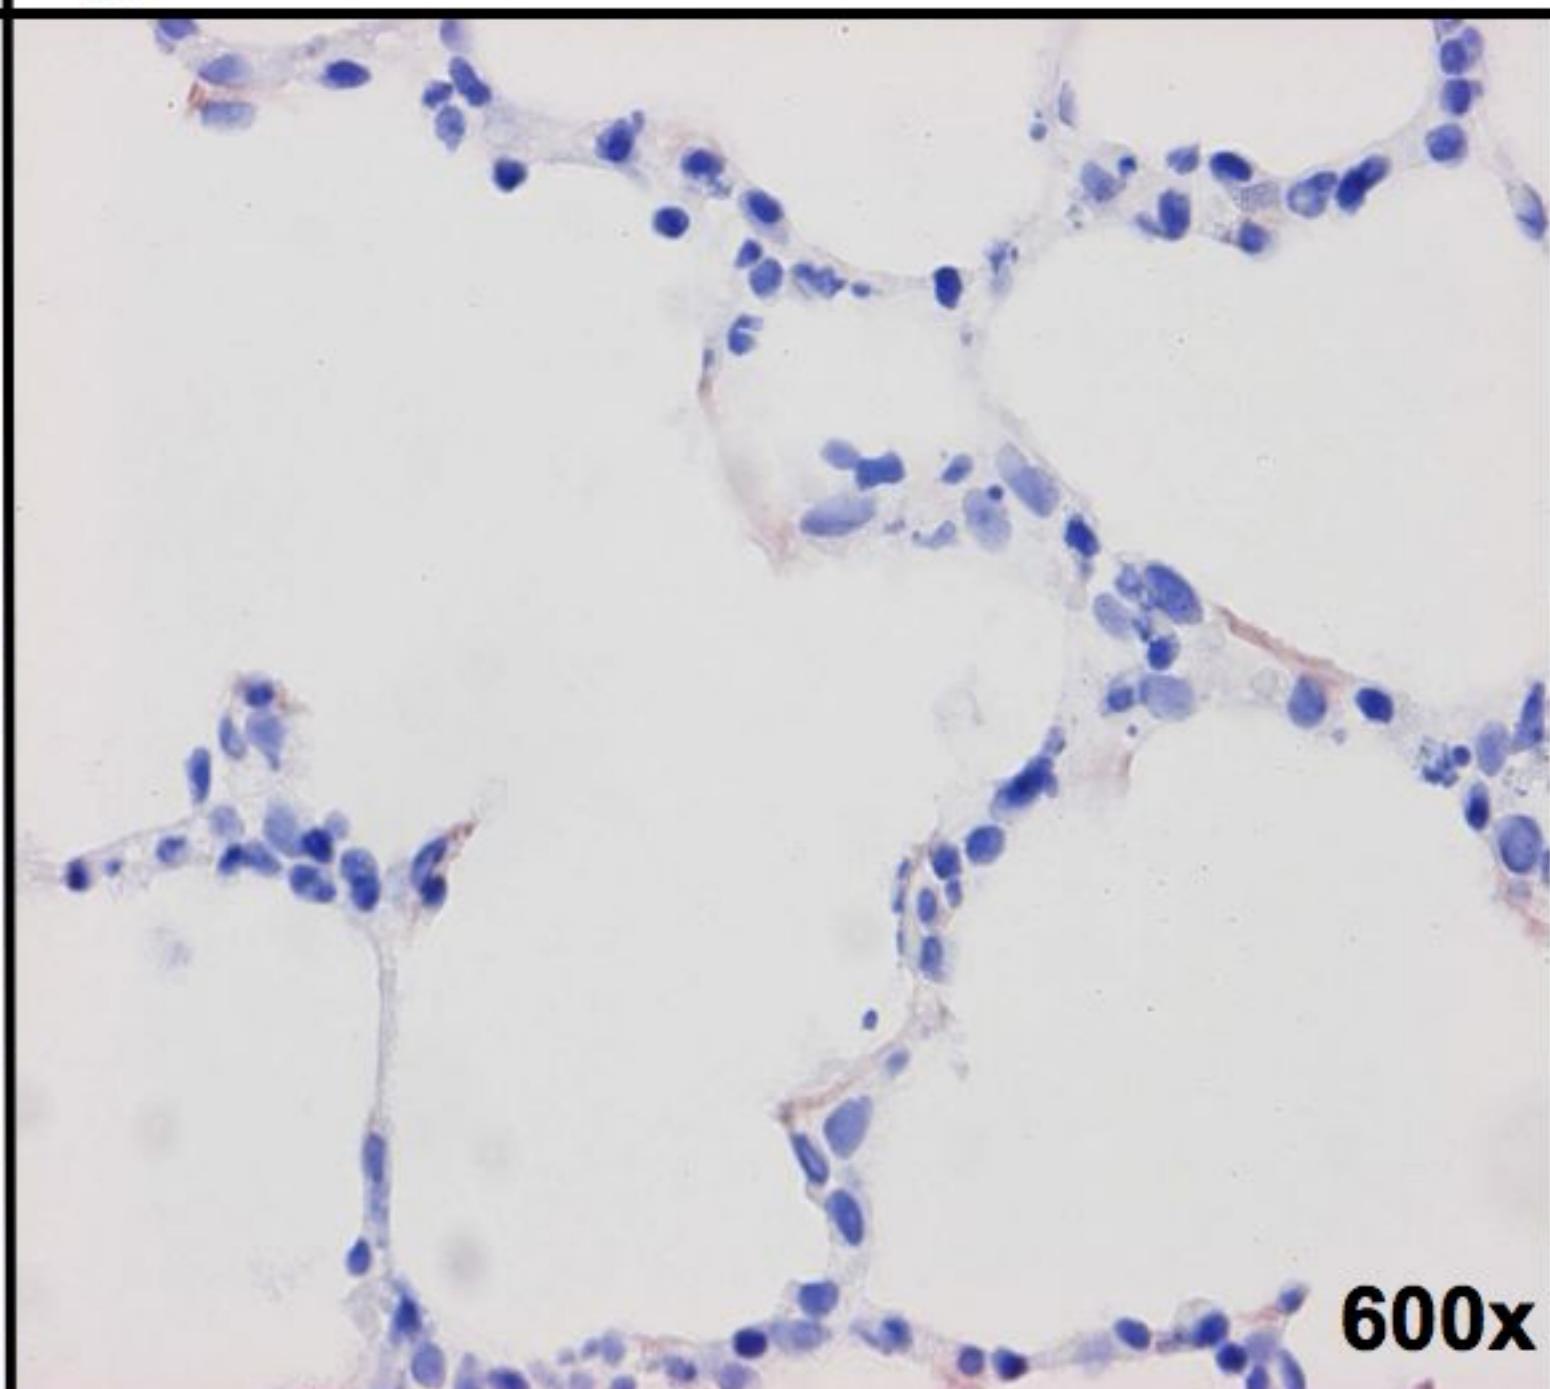

**C** ++

**F** +/-

**c** +/-

**f** -

Supplement: MOESM3 [file 9609188]
